# Supplementary material
Source: MDPI journal article supplement (doi:10.3390/solids7020021)
Supplement: s1 [file solids-4188665-supplementary.pdf › solids-4188665-supplementary.pdf]

Supplementary File

## **Byproduct-Compatible Upcycling of Plastic Pyrolysis Wax into Activated Carbon for Supercapacitor Electrodes**

Tae Hun Kim<sup>1,2,†</sup>, Seung Gun Kim<sup>3,†</sup>, Jongyun Choi<sup>3</sup>, Ji Chul Jung<sup>3</sup>, Jung-Chul An<sup>1</sup>,  
Patrick Joohyun Kim<sup>2</sup>, Dalsu Choi<sup>3,\*</sup>, Inchan Yang<sup>1,\*</sup>

<sup>1</sup>*Resources Metallurgy & Refining Research Group, Research Institute of Industrial Science & Technology (RIST), Pohang 37673, Republic of Korea*

<sup>2</sup>*School of Chemical Engineering and Applied Chemistry, Kyungpook National University, Daegu 41566, Republic of Korea*

<sup>3</sup>*Department of Chemical Engineering, Myongji University, Yongin 17058, Republic of Korea*

<sup>†</sup>These authors contributed equally to this work.

\*Corresponding authors

E-mail address: dalsuchoi@mju.ac.kr (D. Choi)

E-mail address: iyang@rist.re.kr (I. Yang)

Figure S1. Optical images and TGA curves of PEWax\_SY samples stabilized by sulfonation at 130 and 150 °C

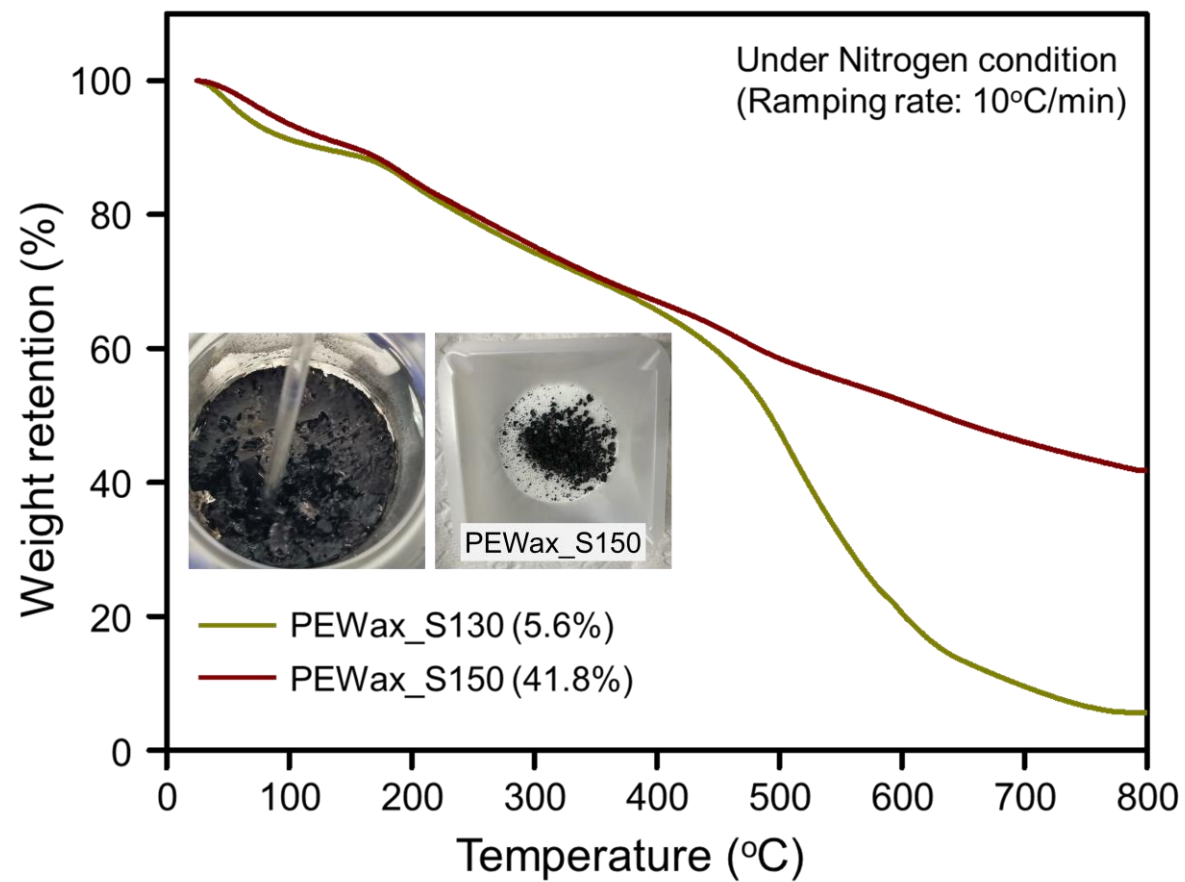

Figure S2. Thermogravimetric behavior of thermally oxidized commercial LLDPE (PE\_TX) for comparison with PE pyrolysis wax

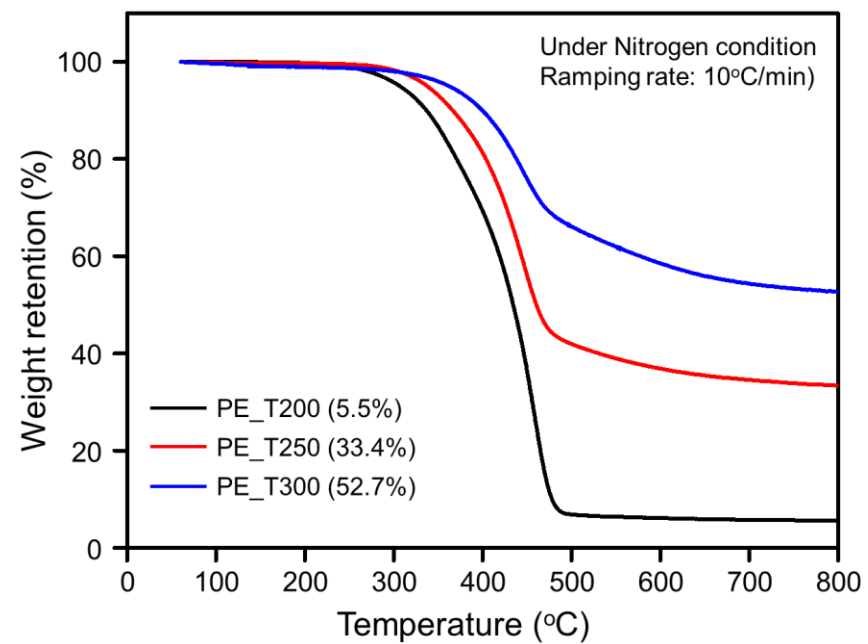

Figure S3. SEM image of PEWax\_AC obtained at an appropriate magnification (5k) to illustrate the surface morphology of the activated carbon

Commercial AC

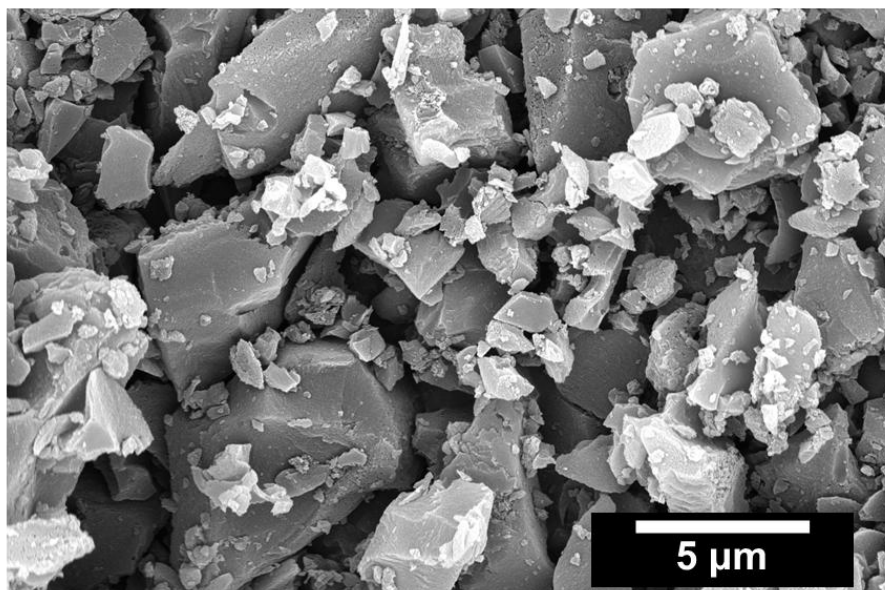

PEWax\_AC

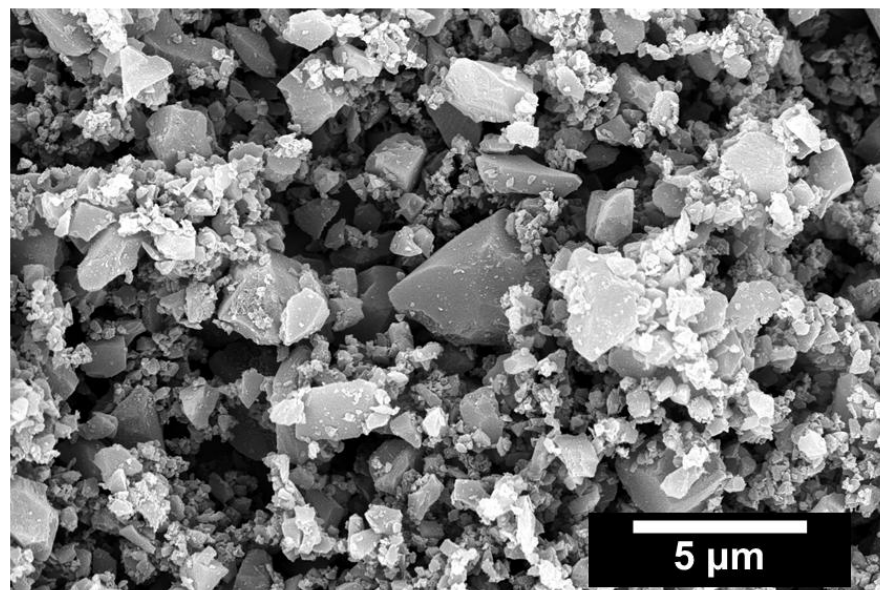

Figure S4. BJH pore size distribution of PEWax\_AC and commercial activated carbon derived from nitrogen adsorption–desorption measurements

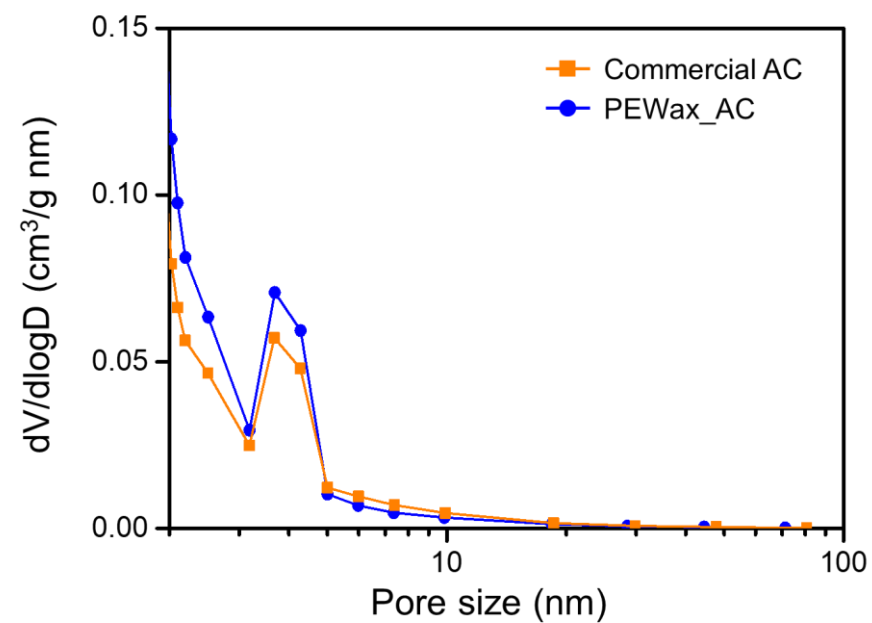

Figure S5. Raman spectra of PEWax\_AC and commercial activated carbon

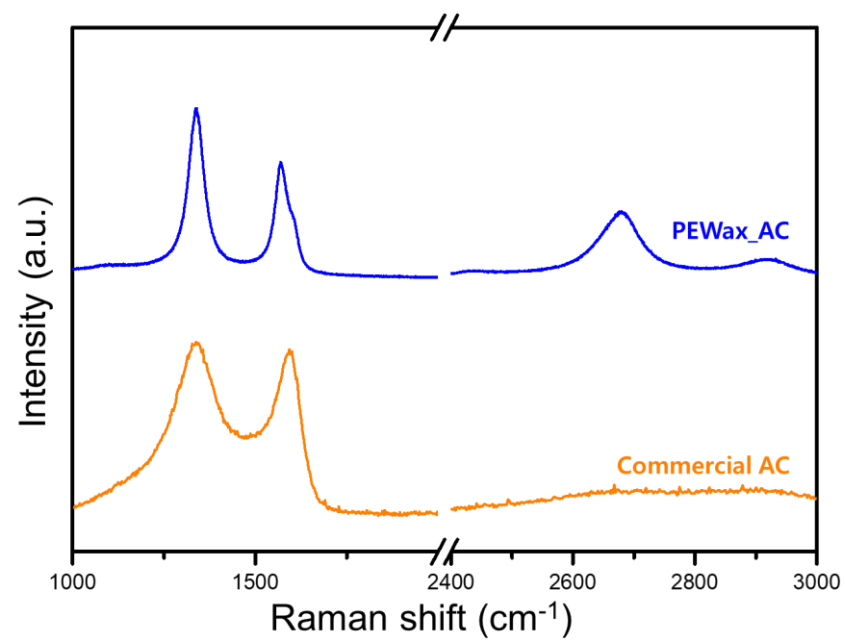

Figure S6. Galvanostatic charge–discharge (GCD) profiles of (a) commercial activated carbon and (b) PEWax\_AC electrodes at different current densities

a

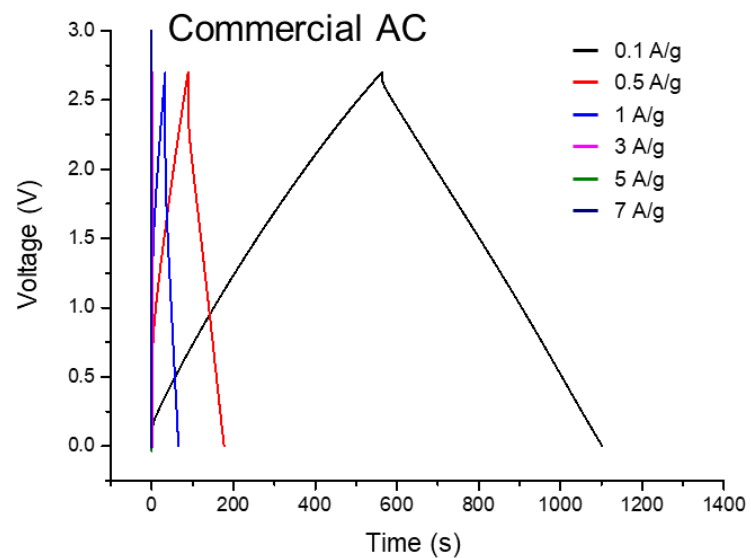

b

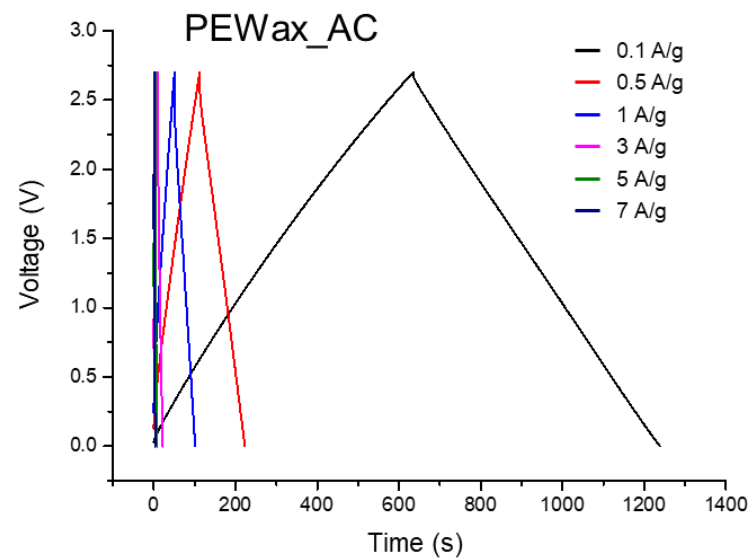

Table S1. Material specifications of the commercial linear low-density polyethylene (LLDPE) employed for stabilization experiments

| Sample | Manufacturer   | Nationality       | Model |
|--------|----------------|-------------------|-------|
| LLDPE  | Lotte Chemical | Republic of Korea | UL814 |



Table S2. Volumetric capacitance of PEWax\_AC and commercial activated carbon in supercapacitors

| Sample        | Current density (A/g)                       |      |      |      |     |      |
|---------------|---------------------------------------------|------|------|------|-----|------|
|               | 0.1                                         | 0.5  | 1    | 3    | 5   | 7    |
|               | Volumetric capacitance (F/cm <sup>3</sup> ) |      |      |      |     |      |
| Commercial AC | 23.8                                        | 19.4 | 14.5 | 1.7  | 0.1 | <0.1 |
| PEWax_AC      | 24.6                                        | 22.6 | 20.7 | 13.2 | 8.1 | 4.6  |

Table S3. Four-probe electrical conductivity of EDLC electrodes prepared from commercial AC and PEWax\_AC

| Sample                  | Commercial AC | PEWax_AC |
|-------------------------|---------------|----------|
| Resistance<br>(Ohm/sq.) | 843.2         | 380.4    |
